# Supplementary material for: Stable and biocompatible slippery lubricant-infused anode-oxidated titanium nanotube surfaces via a grafted polydimethylsiloxane brush
Source: Royal Society of Chemistry journal article supplement (doi:10.1039/d1nj03465k), 2021-01-01
Supplement: d1nj03465k1.pdf [file d1nj03465k1.pdf]

## Supporting Information

### **Stable and biocompatible Slippery Lubricant-infused Anode Oxidated Titanium Nanotube Surface via Grafted Polydimethylsiloxane Brush**

Xiangsheng Chen <sup>a,b</sup>, Jinxia Huang\* <sup>b</sup> and Zhiguang Guo\* <sup>a,b</sup>

a. Hubei Collaborative Innovation Centre for Advanced Organic Chemical Materials and Ministry of Education Key Laboratory for the Green Preparation and Application of Functional Materials, Hubei University, Wuhan 430062, People's Republic of China

b. State Key Laboratory of Solid Lubrication, Lanzhou Institute of Chemical Physics, Chinese Academy of Sciences, Lanzhou 730000, People's Republic of China.

\*Corresponding author. E-mail: [zguo@licp.cas.cn](mailto:zguo@licp.cas.cn) (Guo); [huangjx@licp.cas.cn](mailto:huangjx@licp.cas.cn) (Huang); Fax: +86-931-8277088; Tel.: +86-931-4968105

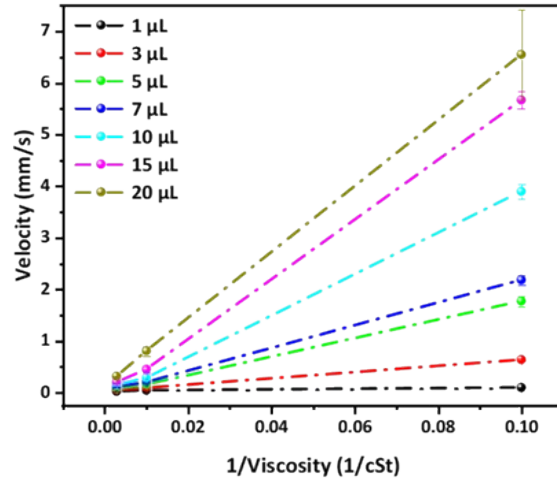

Figure S1. The relationship between the sliding speed of the droplet and the viscosity of the lubricant.
